# Supplementary material
Source: PubMed Central journal article supplement (PMC2768392)
Supplement: NIHMS90435-supplement-02.pdf [file NIHMS90435-supplement-02.pdf]

|                                            | Average Velocity ( $\mu\text{m/s}$ ) |                              | % of Time in Motion        |                            | Stop Frequency                | Turn Back Frequency           | Length ( $\mu\text{m}$ )    |
|--------------------------------------------|--------------------------------------|------------------------------|----------------------------|----------------------------|-------------------------------|-------------------------------|-----------------------------|
|                                            | Anterograde                          | Retrograde                   | Anterograde                | Retrograde                 |                               |                               |                             |
| RFP-mito, SYP-YFP                          | 0.12<br>$\pm 0.01$<br>(n=32)         | 0.12<br>$\pm 0.01$<br>(n=40) | 14<br>$\pm 2.6$<br>(n=152) | 15<br>$\pm 2.4$<br>(n=152) | 0.13<br>$\pm 0.03$<br>(n=152) | 0.02<br>$\pm 0.01$<br>(n=152) | 1.6<br>$\pm 0.1$<br>(n=111) |
| RFP-mito, Miro, SYP-YFP                    | 0.10<br>$\pm 0.01$<br>(n=23)         | 0.12<br>$\pm 0.01$<br>(n=26) | 12<br>$\pm 2.4$<br>(n=145) | 14<br>$\pm 2.6$<br>(n=145) | 0.08<br>$\pm 0.02$<br>(n=145) | 0.00<br>$\pm 0.00$<br>(n=145) | 1.6<br>$\pm 0.1$<br>(n=118) |
| RFP-mito, Miro <sup>KK</sup> , SYP-YFP     | 0.13<br>$\pm 0.01$<br>(n=30)         | 0.13<br>$\pm 0.01$<br>(n=26) | 17<br>$\pm 2.8$<br>(n=156) | 13<br>$\pm 2.6$<br>(n=156) | 0.06<br>$\pm 0.02$<br>(n=156) | 0.00<br>$\pm 0.00$<br>(n=156) | 1.7<br>$\pm 0.1$<br>(n=122) |
| RFP-mito, Miro, KHC, milton                | 0.12<br>$\pm 0.01$<br>(n=21)         | 0.12<br>$\pm 0.02$<br>(n=17) | 11<br>$\pm 2.5$<br>(n=144) | 9<br>$\pm 2.3$<br>(n=144)  | 0.05<br>$\pm 0.02$<br>(n=144) | 0.00<br>$\pm 0.00$<br>(n=144) | 1.4<br>$\pm 0.1$<br>(n=121) |
| RFP-mito, Miro <sup>KK</sup> , KHC, milton | 0.11<br>$\pm 0.01$<br>(n=28)         | 0.12<br>$\pm 0.01$<br>(n=24) | 15<br>$\pm 2.7$<br>(n=147) | 14<br>$\pm 2.7$<br>(n=147) | 0.07<br>$\pm 0.02$<br>(n=147) | 0.01<br>$\pm 0.01$<br>(n=147) | 1.5<br>$\pm 0.1$<br>(n=122) |
| One-Way Anova                              | 0.843                                | 0.858                        | 0.604                      | 0.518                      | 0.087                         | 0.228                         | 0.064                       |

**Table S1.1 Movement Parameters of Mitochondria before Calcimycin Treatment**

Average Velocity is defined as the average velocity of all instantaneous velocities that are NOT zero for a mitochondrion; % of time in Motion is calculated by the numbers of instantaneous velocities that are not zero divided by the numbers of total instantaneous velocities (including both zero and non-zero) for a mitochondrion; Stop Frequency is defined as the frequency per mitochondrion that the instantaneous velocity changes to zero; Turn Back Frequency is defined as the frequency per mitochondrion that the direction of instantaneous velocity reverses. The definitions are for all tables. Data is from 10 axons from 4 transfections.

|                                               | Average Velocity ( $\mu\text{m/s}$ ) |                              | % of Time in Motion        |                            | Stop Frequency                | Turn Back Frequency           | Length ( $\mu\text{m}$ )    |
|-----------------------------------------------|--------------------------------------|------------------------------|----------------------------|----------------------------|-------------------------------|-------------------------------|-----------------------------|
|                                               | Anterograde                          | Retrograde                   | Anterograde                | Retrograde                 |                               |                               |                             |
| RFP-mito,<br>SYP-YFP                          | 0.17<br>$\pm 0.04$<br>(n=8)          | 0.16<br>$\pm 0.03$<br>(n=16) | 3<br>$\pm 1.2$<br>(n=147)  | 5<br>$\pm 1.4$<br>(n=147)  | 0.11<br>$\pm 0.03$<br>(n=147) | 0.00<br>$\pm 0.00$<br>(n=147) | 1.6<br>$\pm 0.1$<br>(n=112) |
| RFP-mito,<br>Miro, SYP-YFP                    | 0.12<br>$\pm 0.03$<br>(n=4)          | 0.10<br>$\pm 0.02$<br>(n=6)  | 1<br>$\pm 0.6$<br>(n=136)  | 3<br>$\pm 1.3$<br>(n=136)  | 0.03<br>$\pm 0.01$<br>(n=136) | 0.00<br>$\pm 0.00$<br>(n=136) | 1.6<br>$\pm 0.1$<br>(n=116) |
| RFP-mito,<br>Miro <sup>KK</sup> , SYP-YFP     | 0.13<br>$\pm 0.02$<br>(n=27)         | 0.14<br>$\pm 0.03$<br>(n=27) | 11<br>$\pm 2.3$<br>(n=154) | 12<br>$\pm 2.3$<br>(n=154) | 0.07<br>$\pm 0.02$<br>(n=154) | 0.00<br>$\pm 0.00$<br>(n=154) | 1.7<br>$\pm 0.1$<br>(n=121) |
| RFP-mito,<br>Miro, KHC, milton                | 0.15<br>$\pm 0.06$<br>(n=5)          | 0.11<br>$\pm 0.02$<br>(n=5)  | 3<br>$\pm 1.3$<br>(n=135)  | 3<br>$\pm 1.4$<br>(n=135)  | 0.01<br>$\pm 0.01$<br>(n=135) | 0.00<br>$\pm 0.00$<br>(n=135) | 1.5<br>$\pm 0.1$<br>(n=119) |
| RFP-mito,<br>Miro <sup>KK</sup> , KHC, milton | 0.14<br>$\pm 0.02$<br>(n=29)         | 0.10<br>$\pm 0.01$<br>(n=28) | 18<br>$\pm 3.1$<br>(n=140) | 16<br>$\pm 2.9$<br>(n=140) | 0.07<br>$\pm 0.02$<br>(n=140) | 0.04<br>$\pm 0.03$<br>(n=140) | 1.5<br>$\pm 0.1$<br>(n=121) |
| One-Way Anova                                 | 0.870                                | 0.259                        | <0.001                     | <0.001                     | 0.013                         | 0.096                         | 0.212                       |

**Table S1.2 Movement Parameters of Mitochondria after Calcimycin Treatment**

Data is from 10 axons from 4 transfections.

| RFP-mito,<br>SYP-YFP  | Average Velocity ( $\mu\text{m/s}$ ) |                             | % of Time in Motion       |                           | Stop<br>Frequency            | Turn Back<br>Frequency       |
|-----------------------|--------------------------------------|-----------------------------|---------------------------|---------------------------|------------------------------|------------------------------|
|                       | Anterograde                          | Retrograde                  | Anterograde               | Retrograde                |                              |                              |
| Before                | 0.10<br>$\pm 0.01$<br>(n=12)         | 0.10<br>$\pm 0.02$<br>(n=9) | 26<br>$\pm 6.2$<br>(n=44) | 8<br>$\pm 3.6$<br>(n=44)  | 0.11<br>$\pm 0.05$<br>(n=44) | 0.02<br>$\pm 0.02$<br>(n=44) |
| After                 | 0.10<br>$\pm 0.01$<br>(n=11)         | 0.13<br>$\pm 0.01$<br>(n=8) | 22<br>$\pm 5.8$<br>(n=43) | 14<br>$\pm 4.9$<br>(n=43) | 0.19<br>$\pm 0.06$<br>(n=43) | 0.00<br>$\pm 0.00$<br>(n=43) |
| Mann-Whitney <i>U</i> | 0.833                                | 0.252                       | 0.599                     | 0.207                     | 0.346                        | 0.303                        |

**Table S2 Movement Parameters of Synaptophysin-YFP before and after Calcimycin Treatment**

Data is from 4 axons from 3 transfections.

|                             | Average Velocity ( $\mu\text{m/s}$ ) |                              | % of Time in Motion       |                           | Stop Frequency               | Turn Back Frequency          |
|-----------------------------|--------------------------------------|------------------------------|---------------------------|---------------------------|------------------------------|------------------------------|
|                             | Anterograde                          | Retrograde                   | Anterograde               | Retrograde                |                              |                              |
| RFP-mito,<br>SYP-YFP        | 0.11<br>$\pm 0.01$<br>(n=12)         | 0.12<br>$\pm 0.01$<br>(n=17) | 15<br>$\pm 4.3$<br>(n=57) | 16<br>$\pm 4.1$<br>(n=57) | 0.18<br>$\pm 0.05$<br>(n=57) | 0.00<br>$\pm 0.00$<br>(n=57) |
| RFP-mito,<br>KIF5C1-335-YFP | 0.13<br>$\pm 0.02$<br>(n=14)         | 0.12<br>$\pm 0.02$<br>(n=10) | 18<br>$\pm 4.7$<br>(n=54) | 14<br>$\pm 4.5$<br>(n=54) | 0.07<br>$\pm 0.04$<br>(n=54) | 0.02<br>$\pm 0.02$<br>(n=54) |
| Mann-Whitney <i>U</i>       | 0.782                                | 0.749                        | 0.567                     | 0.269                     | 0.109                        | 0.304                        |

**Table S3.1 Movement Parameters of Mitochondria before Calcimycin Treatment**

|                             | Average Velocity ( $\mu\text{m/s}$ ) |                             | % of Time in Motion       |                           | Stop Frequency               | Turn Back Frequency          |
|-----------------------------|--------------------------------------|-----------------------------|---------------------------|---------------------------|------------------------------|------------------------------|
|                             | Anterograde                          | Retrograde                  | Anterograde               | Retrograde                |                              |                              |
| RFP-mito,<br>SYP-YFP        | 0.14<br>$\pm 0.04$<br>(n=2)          | 0.14<br>$\pm 0.06$<br>(n=3) | 2<br>$\pm 1.5$<br>(n=55)  | 2<br>$\pm 1.5$<br>(n=55)  | 0.11<br>$\pm 0.04$<br>(n=55) | 0.00<br>$\pm 0.00$<br>(n=55) |
| RFP-mito,<br>KIF5C1-335-YFP | 0.17<br>$\pm 0.03$<br>(n=10)         | 0.13<br>$\pm 0.01$<br>(n=9) | 21<br>$\pm 5.7$<br>(n=48) | 19<br>$\pm 5.6$<br>(n=48) | 0.03<br>$\pm 0.00$<br>(n=48) | 0.00<br>$\pm 0.00$<br>(n=48) |
| Mann-Whitney <i>U</i>       | 0.909                                | 0.727                       | 0.003                     | 0.023                     | 0.077                        | 1                            |

**Table S3.2 Movement Parameters of Mitochondria after Calcimycin Treatment**

Data is from 6 axons from 3 transfections.

|                                             | Average Velocity ( $\mu\text{m/s}$ ) |                              | % of Time in Motion       |                           | Stop Frequency               | Turn Back Frequency          |
|---------------------------------------------|--------------------------------------|------------------------------|---------------------------|---------------------------|------------------------------|------------------------------|
|                                             | Anterograde                          | Retrograde                   | Anterograde               | Retrograde                |                              |                              |
| RFP-mito,<br>Miro, PSD95-YFP                | 0.11<br>$\pm 0.01$<br>(n=13)         | 0.14<br>$\pm 0.01$<br>(n=15) | 18<br>$\pm 4.7$<br>(n=58) | 23<br>$\pm 5.4$<br>(n=58) | 0.09<br>$\pm 0.04$<br>(n=58) | 0.02<br>$\pm 0.02$<br>(n=58) |
| RFP-mito,<br>Miro <sup>KK</sup> , PSD95-YFP | 0.14<br>$\pm 0.02$<br>(n=15)         | 0.13<br>$\pm 0.02$<br>(n=15) | 21<br>$\pm 5.2$<br>(n=61) | 22<br>$\pm 5.2$<br>(n=61) | 0.33<br>$\pm 0.02$<br>(n=61) | 0.00<br>$\pm 0.00$<br>(n=61) |
| Mann-Whitney <i>U</i>                       | 0.217                                | 0.775                        | 0.968                     | 0.872                     | 0.218                        | 1                            |

**Table S4.1 Movement Parameters of Mitochondria before Glutamate Treatment**

|                                             | Average Velocity ( $\mu\text{m/s}$ ) |                              | % of Time in Motion       |                           | Stop Frequency               | Turn Back Frequency          |
|---------------------------------------------|--------------------------------------|------------------------------|---------------------------|---------------------------|------------------------------|------------------------------|
|                                             | Anterograde                          | Retrograde                   | Anterograde               | Retrograde                |                              |                              |
| RFP-mito,<br>Miro, PSD95-YFP                | N.A.                                 | 0.08<br>$\pm 0.01$<br>(n=2)  | 0<br>$\pm 0.0$<br>(n=56)  | 3<br>$\pm 1.9$<br>(n=56)  | 0.00<br>$\pm 0.00$<br>(n=56) | 0.00<br>$\pm 0.00$<br>(n=56) |
| RFP-mito,<br>Miro <sup>KK</sup> , PSD95-YFP | 0.15<br>$\pm 0.02$<br>(n=14)         | 0.10<br>$\pm 0.01$<br>(n=15) | 19<br>$\pm 5.0$<br>(n=53) | 21<br>$\pm 5.0$<br>(n=53) | 0.11<br>$\pm 0.04$<br>(n=53) | 0.00<br>$\pm 0.00$<br>(n=53) |
| Mann-Whitney <i>U</i>                       | N.A.                                 | 0.618                        | <0.001                    | <0.001                    | 0.01                         | 1                            |

**Table S4.2 Movement Parameters of Mitochondria after Glutamate Treatment**

Data is from 6 axons from 3 transfections. N.A., not available.
